# Supplementary material
Source: publisher figshare collection journal article supplement (https://acs.figshare.com/ndownloader/files/4506763)
Supplement: Supplementary file 1 [file 4506763]

 
data_jrh024f2 
 
_audit_creation_method            SHELXL-97 
_chemical_name_systematic 
; 
 ? 
; 
_chemical_name_common             ? 
_chemical_melting_point           ? 
_chemical_formula_moiety          ? 
_chemical_formula_sum 
 'C21 H21 N O4' 
_chemical_formula_weight          351.39 
_chemical_absolute_configuration  unk
 
loop_ 
 _atom_type_symbol 
 _atom_type_description 
 _atom_type_scat_dispersion_real 
 _atom_type_scat_dispersion_imag 
 _atom_type_scat_source 
 'C'  'C'   0.0033   0.0016 
 'International Tables Vol C Tables 4.2.6.8 and 6.1.1.4' 
 'H'  'H'   0.0000   0.0000 
 'International Tables Vol C Tables 4.2.6.8 and 6.1.1.4' 
 'N'  'N'   0.0061   0.0033 
 'International Tables Vol C Tables 4.2.6.8 and 6.1.1.4' 
 'O'  'O'   0.0106   0.0060 
 'International Tables Vol C Tables 4.2.6.8 and 6.1.1.4' 
 
_symmetry_cell_setting            'monoclinic' 
_symmetry_space_group_name_H-M    'P 21/c'
_symmetry_space_group_name_Hall   '-P 2ybc' 
 
loop_ 
 _symmetry_equiv_pos_as_xyz 
 'x, y, z' 
 '-x, y+1/2, -z+1/2' 
 '-x, -y, -z' 
 'x, -y-1/2, z-1/2' 
 
_cell_length_a                    7.7034(9) 
_cell_length_b                    23.256(3) 
_cell_length_c                    10.1217(12) 
_cell_angle_alpha                 90.00 
_cell_angle_beta                  91.325(2) 
_cell_angle_gamma                 90.00 
_cell_volume                      1812.8(4) 
_cell_formula_units_Z             4 
_cell_measurement_temperature     294(2) 
_cell_measurement_reflns_used     964 
_cell_measurement_theta_min       -23.529 
_cell_measurement_theta_max       23.529 
 
_exptl_crystal_description        'parallelepiped' 
_exptl_crystal_colour             'colorless' 
_exptl_crystal_size_max           0.18 
_exptl_crystal_size_mid           0.17 
_exptl_crystal_size_min           0.14 
_exptl_crystal_density_meas       ? 
_exptl_crystal_density_diffrn     1.287 
_exptl_crystal_density_method     'not measured' 
_exptl_crystal_F_000              744 
_exptl_absorpt_coefficient_mu     0.089 
_exptl_absorpt_correction_type    'Empirical' 
_exptl_absorpt_correction_T_min   0.9840 
_exptl_absorpt_correction_T_max   0.9879 
_exptl_absorpt_process_details    'SADABS' 
 
_exptl_special_details 
; 
 ? 
; 
 
_diffrn_ambient_temperature       294(2) 
_diffrn_radiation_wavelength      0.71073 
_diffrn_radiation_type            MoK\a 
_diffrn_radiation_source          'fine-focus sealed tube' 
_diffrn_radiation_monochromator   graphite 
_diffrn_measurement_device_type   'Bruker Smart Apex' 
_diffrn_measurement_method        'phi-omega scan' 
_diffrn_detector_area_resol_mean  ? 
_diffrn_standards_number          ? 
_diffrn_standards_interval_count  ? 
_diffrn_standards_interval_time   ? 
_diffrn_standards_decay_%         0 
_diffrn_reflns_number             15594 
_diffrn_reflns_av_R_equivalents   0.0212 
_diffrn_reflns_av_sigmaI/netI     0.0205 
_diffrn_reflns_limit_h_min        -10 
_diffrn_reflns_limit_h_max        9 
_diffrn_reflns_limit_k_min        -30 
_diffrn_reflns_limit_k_max        30 
_diffrn_reflns_limit_l_min        -13 
_diffrn_reflns_limit_l_max        13 
_diffrn_reflns_theta_min          1.75 
_diffrn_reflns_theta_max          28.24 
_reflns_number_total              4317 
_reflns_number_gt                 3256 
_reflns_threshold_expression      >2sigma(I) 
 
_computing_data_collection        'BRUKER SMART' 
_computing_cell_refinement        'BRUKER SMART' 
_computing_data_reduction         'BRUKER SAINT' 
_computing_structure_solution     'SHELXS-97 (Sheldrick, 1990)' 
_computing_structure_refinement   'SHELXL-97 (Sheldrick, 1997)' 
_computing_molecular_graphics     'Ortep-3' 
_computing_publication_material   'Wingx publication routines (Farrugia, 1999)' 
 
_refine_special_details 
; 
 Refinement of F^2^ against ALL reflections.  The weighted R-factor wR and 
 goodness of fit S are based on F^2^, conventional R-factors R are based 
 on F, with F set to zero for negative F^2^. The threshold expression of 
 F^2^ > 2sigma(F^2^) is used only for calculating R-factors(gt) etc. and is 
 not relevant to the choice of reflections for refinement.  R-factors based 
 on F^2^ are statistically about twice as large as those based on F, and R- 
 factors based on ALL data will be even larger. 
; 
 
_refine_ls_structure_factor_coef  Fsqd  
_refine_ls_matrix_type            full 
_refine_ls_weighting_scheme       calc  
_refine_ls_weighting_details 
 'calc w=1/[\s^2^(Fo^2^)+(0.0858P)^2^+0.4797P] where P=(Fo^2^+2Fc^2^)/3' 
_atom_sites_solution_primary      direct 
_atom_sites_solution_secondary    difmap 
_atom_sites_solution_hydrogens    geom 
_refine_ls_hydrogen_treatment     constr 
_refine_ls_extinction_method      none 
_refine_ls_extinction_coef        ? 
_refine_ls_number_reflns          4317 
_refine_ls_number_parameters      236 
_refine_ls_number_restraints      0 
_refine_ls_R_factor_all           0.0744 
_refine_ls_R_factor_gt            0.0580 
_refine_ls_wR_factor_ref          0.1734 
_refine_ls_wR_factor_gt           0.1595 
_refine_ls_goodness_of_fit_ref    1.042 
_refine_ls_restrained_S_all       1.042 
_refine_ls_shift/su_max           0.000 
_refine_ls_shift/su_mean          0.000 
 
loop_ 
 _atom_site_label 
 _atom_site_type_symbol 
 _atom_site_fract_x 
 _atom_site_fract_y 
 _atom_site_fract_z 
 _atom_site_U_iso_or_equiv 
 _atom_site_adp_type 
 _atom_site_occupancy 
 _atom_site_symmetry_multiplicity 
 _atom_site_calc_flag 
 _atom_site_refinement_flags 
 _atom_site_disorder_assembly 
 _atom_site_disorder_group 
C1 C 0.3120(2) 0.69928(8) 0.46687(17) 0.0503(4) Uani 1 1 d . . . 
H1 H 0.2554 0.7197 0.5321 0.060 Uiso 1 1 calc R . . 
C2 C 0.2744(3) 0.71080(9) 0.3348(2) 0.0610(5) Uani 1 1 d . . . 
H2 H 0.1942 0.7392 0.3121 0.073 Uiso 1 1 calc R . . 
C3 C 0.3549(3) 0.68059(8) 0.23768(18) 0.0610(5) Uani 1 1 d . . . 
H3 H 0.3294 0.6883 0.1492 0.073 Uiso 1 1 calc R . . 
C4 C 0.4726(3) 0.63906(9) 0.27147(18) 0.0628(5) Uani 1 1 d . . . 
H4 H 0.5266 0.6182 0.2057 0.075 Uiso 1 1 calc R . . 
C5 C 0.5125(2) 0.62772(8) 0.40292(17) 0.0541(4) Uani 1 1 d . . . 
H5 H 0.5939 0.5995 0.4245 0.065 Uiso 1 1 calc R . . 
C6 C 0.43272(19) 0.65779(7) 0.50251(15) 0.0398(3) Uani 1 1 d . . . 
C7 C 0.47678(19) 0.64715(7) 0.64832(14) 0.0417(3) Uani 1 1 d . . . 
H7 H 0.4659 0.6840 0.6945 0.050 Uiso 1 1 calc R . . 
C8 C 0.6620(2) 0.62691(8) 0.66804(16) 0.0489(4) Uani 1 1 d . . . 
C9 C 0.7054(2) 0.57434(9) 0.70723(18) 0.0560(5) Uani 1 1 d . . . 
H9 H 0.8229 0.5656 0.7153 0.067 Uiso 1 1 calc R . . 
C10 C 0.5790(2) 0.52861(9) 0.7390(2) 0.0601(5) Uani 1 1 d . . . 
H10A H 0.5776 0.5235 0.8341 0.072 Uiso 1 1 calc R . . 
H10B H 0.6168 0.4927 0.7003 0.072 Uiso 1 1 calc R . . 
C11 C 0.3941(2) 0.54214(7) 0.68817(16) 0.0460(4) Uani 1 1 d . . . 
H11 H 0.3966 0.5366 0.5923 0.055 Uiso 1 1 calc R . . 
C12 C 0.3448(2) 0.60537(7) 0.70778(15) 0.0429(4) Uani 1 1 d . . . 
H12 H 0.2320 0.6119 0.6637 0.051 Uiso 1 1 calc R . . 
C13 C 0.2573(2) 0.50069(7) 0.73652(17) 0.0480(4) Uani 1 1 d . . . 
C14 C 0.2441(3) 0.48604(9) 0.86861(19) 0.0650(5) Uani 1 1 d . . . 
H14 H 0.3220 0.5016 0.9304 0.078 Uiso 1 1 calc R . . 
C15 C 0.1168(3) 0.44867(10) 0.9097(2) 0.0764(6) Uani 1 1 d . . . 
H15 H 0.1096 0.4395 0.9989 0.092 Uiso 1 1 calc R . . 
C16 C 0.0015(3) 0.42513(10) 0.8208(3) 0.0740(6) Uani 1 1 d . . . 
H16 H -0.0841 0.4001 0.8491 0.089 Uiso 1 1 calc R . . 
C17 C 0.0128(3) 0.43862(10) 0.6896(3) 0.0707(6) Uani 1 1 d . . . 
H17 H -0.0648 0.4224 0.6285 0.085 Uiso 1 1 calc R . . 
C18 C 0.1394(2) 0.47636(8) 0.64750(19) 0.0561(4) Uani 1 1 d . . . 
H18 H 0.1453 0.4855 0.5582 0.067 Uiso 1 1 calc R . . 
C19 C 0.8014(2) 0.66861(10) 0.6367(2) 0.0635(5) Uani 1 1 d . . . 
C20 C 0.8527(4) 0.76788(14) 0.5874(4) 0.1129(12) Uani 1 1 d . . . 
H20A H 0.8449 0.7997 0.6489 0.136 Uiso 1 1 calc R . . 
H20B H 0.9717 0.7541 0.5899 0.136 Uiso 1 1 calc R . . 
C21 C 0.8118(5) 0.7866(2) 0.4640(4) 0.1520(18) Uani 1 1 d . . . 
H21A H 0.8287 0.7560 0.4020 0.228 Uiso 1 1 calc R . . 
H21B H 0.8850 0.8185 0.4423 0.228 Uiso 1 1 calc R . . 
H21C H 0.6925 0.7986 0.4601 0.228 Uiso 1 1 calc R . . 
N1 N 0.3270(2) 0.61901(7) 0.85304(15) 0.0567(4) Uani 1 1 d . . . 
O1 O 0.95070(18) 0.65650(9) 0.6212(2) 0.0971(6) Uani 1 1 d . . . 
O2 O 0.73864(18) 0.72212(7) 0.62868(18) 0.0799(5) Uani 1 1 d . . . 
O3 O 0.4524(2) 0.61533(10) 0.92537(15) 0.1016(7) Uani 1 1 d . . . 
O4 O 0.1871(3) 0.63145(11) 0.89139(18) 0.1132(8) Uani 1 1 d . . . 
 
loop_ 
 _atom_site_aniso_label 
 _atom_site_aniso_U_11 
 _atom_site_aniso_U_22 
 _atom_site_aniso_U_33 
 _atom_site_aniso_U_23 
 _atom_site_aniso_U_13 
 _atom_site_aniso_U_12 
C1 0.0478(9) 0.0560(10) 0.0469(9) -0.0027(7) -0.0025(7) 0.0096(7) 
C2 0.0660(11) 0.0597(11) 0.0565(11) 0.0079(8) -0.0159(9) 0.0096(9) 
C3 0.0820(13) 0.0610(11) 0.0395(9) 0.0089(8) -0.0082(8) -0.0047(10) 
C4 0.0838(14) 0.0667(12) 0.0383(9) -0.0022(8) 0.0083(9) 0.0070(10) 
C5 0.0619(10) 0.0567(10) 0.0439(9) 0.0038(7) 0.0065(8) 0.0151(8) 
C6 0.0378(7) 0.0455(8) 0.0361(7) 0.0019(6) 0.0004(6) -0.0009(6) 
C7 0.0394(8) 0.0505(9) 0.0350(7) 0.0002(6) -0.0002(6) 0.0034(6) 
C8 0.0386(8) 0.0683(11) 0.0398(8) 0.0065(7) -0.0028(6) 0.0031(7) 
C9 0.0405(8) 0.0752(12) 0.0522(10) 0.0097(9) -0.0038(7) 0.0097(8) 
C10 0.0521(10) 0.0626(11) 0.0652(12) 0.0110(9) -0.0034(8) 0.0112(8) 
C11 0.0473(8) 0.0534(9) 0.0373(8) 0.0017(7) 0.0001(6) 0.0040(7) 
C12 0.0397(8) 0.0553(9) 0.0336(7) 0.0020(6) 0.0006(6) 0.0040(6) 
C13 0.0493(9) 0.0489(9) 0.0457(9) 0.0010(7) 0.0016(7) 0.0053(7) 
C14 0.0777(13) 0.0699(13) 0.0474(10) 0.0045(9) 0.0005(9) -0.0134(10) 
C15 0.0937(16) 0.0742(14) 0.0617(13) 0.0123(10) 0.0125(11) -0.0145(12) 
C16 0.0689(13) 0.0634(12) 0.0901(17) 0.0086(11) 0.0132(12) -0.0091(10) 
C17 0.0599(12) 0.0687(12) 0.0829(15) -0.0042(11) -0.0107(10) -0.0057(10) 
C18 0.0549(10) 0.0598(11) 0.0532(10) -0.0006(8) -0.0051(8) 0.0040(8) 
C19 0.0432(9) 0.0894(15) 0.0576(11) 0.0223(10) -0.0089(8) -0.0047(9) 
C20 0.0758(16) 0.107(2) 0.155(3) 0.055(2) -0.0263(17) -0.0393(15) 
C21 0.144(3) 0.181(4) 0.130(3) 0.082(3) -0.029(2) -0.073(3) 
N1 0.0683(10) 0.0612(9) 0.0412(8) 0.0012(6) 0.0147(7) 0.0016(8) 
O1 0.0411(8) 0.1288(15) 0.1216(15) 0.0485(12) 0.0024(8) -0.0008(8) 
O2 0.0533(8) 0.0796(10) 0.1061(13) 0.0280(9) -0.0119(8) -0.0163(7) 
O3 0.0889(12) 0.173(2) 0.0421(8) -0.0206(10) -0.0076(8) -0.0094(12) 
O4 0.1018(14) 0.175(2) 0.0641(10) 0.0028(11) 0.0345(10) 0.0557(14) 
 
_geom_special_details 
; 
 All esds (except the esd in the dihedral angle between two l.s. planes) 
 are estimated using the full covariance matrix.  The cell esds are taken 
 into account individually in the estimation of esds in distances, angles 
 and torsion angles; correlations between esds in cell parameters are only 
 used when they are defined by crystal symmetry.  An approximate (isotropic) 
 treatment of cell esds is used for estimating esds involving l.s. planes. 
; 
 
loop_ 
 _geom_bond_atom_site_label_1 
 _geom_bond_atom_site_label_2 
 _geom_bond_distance 
 _geom_bond_site_symmetry_2 
 _geom_bond_publ_flag 
C1 C6 1.382(2) . ? 
C1 C2 1.388(3) . ? 
C1 H1 0.9300 . ? 
C2 C3 1.368(3) . ? 
C2 H2 0.9300 . ? 
C3 C4 1.363(3) . ? 
C3 H3 0.9300 . ? 
C4 C5 1.384(3) . ? 
C4 H4 0.9300 . ? 
C5 C6 1.383(2) . ? 
C5 H5 0.9300 . ? 
C6 C7 1.527(2) . ? 
C7 C8 1.511(2) . ? 
C7 C12 1.539(2) . ? 
C7 H7 0.9800 . ? 
C8 C9 1.326(3) . ? 
C8 C19 1.487(3) . ? 
C9 C10 1.482(3) . ? 
C9 H9 0.9300 . ? 
C10 C11 1.536(2) . ? 
C10 H10A 0.9700 . ? 
C10 H10B 0.9700 . ? 
C11 C13 1.517(2) . ? 
C11 C12 1.533(2) . ? 
C11 H11 0.9800 . ? 
C12 N1 1.514(2) . ? 
C12 H12 0.9800 . ? 
C13 C18 1.385(2) . ? 
C13 C14 1.386(2) . ? 
C14 C15 1.382(3) . ? 
C14 H14 0.9300 . ? 
C15 C16 1.364(3) . ? 
C15 H15 0.9300 . ? 
C16 C17 1.369(3) . ? 
C16 H16 0.9300 . ? 
C17 C18 1.387(3) . ? 
C17 H17 0.9300 . ? 
C18 H18 0.9300 . ? 
C19 O1 1.198(2) . ? 
C19 O2 1.337(3) . ? 
C20 C21 1.353(4) . ? 
C20 O2 1.448(3) . ? 
C20 H20A 0.9700 . ? 
C20 H20B 0.9700 . ? 
C21 H21A 0.9600 . ? 
C21 H21B 0.9600 . ? 
C21 H21C 0.9600 . ? 
N1 O4 1.189(2) . ? 
N1 O3 1.201(2) . ? 
 
loop_ 
 _geom_angle_atom_site_label_1 
 _geom_angle_atom_site_label_2 
 _geom_angle_atom_site_label_3 
 _geom_angle 
 _geom_angle_site_symmetry_1 
 _geom_angle_site_symmetry_3 
 _geom_angle_publ_flag 
C6 C1 C2 120.69(16) . . ? 
C6 C1 H1 119.7 . . ? 
C2 C1 H1 119.7 . . ? 
C3 C2 C1 120.35(17) . . ? 
C3 C2 H2 119.8 . . ? 
C1 C2 H2 119.8 . . ? 
C4 C3 C2 119.56(17) . . ? 
C4 C3 H3 120.2 . . ? 
C2 C3 H3 120.2 . . ? 
C3 C4 C5 120.51(17) . . ? 
C3 C4 H4 119.7 . . ? 
C5 C4 H4 119.7 . . ? 
C6 C5 C4 120.81(17) . . ? 
C6 C5 H5 119.6 . . ? 
C4 C5 H5 119.6 . . ? 
C1 C6 C5 118.06(15) . . ? 
C1 C6 C7 119.91(14) . . ? 
C5 C6 C7 122.02(14) . . ? 
C8 C7 C6 111.48(12) . . ? 
C8 C7 C12 112.44(13) . . ? 
C6 C7 C12 110.26(12) . . ? 
C8 C7 H7 107.5 . . ? 
C6 C7 H7 107.5 . . ? 
C12 C7 H7 107.5 . . ? 
C9 C8 C19 119.13(16) . . ? 
C9 C8 C7 123.89(16) . . ? 
C19 C8 C7 116.94(15) . . ? 
C8 C9 C10 124.35(16) . . ? 
C8 C9 H9 117.8 . . ? 
C10 C9 H9 117.8 . . ? 
C9 C10 C11 112.90(15) . . ? 
C9 C10 H10A 109.0 . . ? 
C11 C10 H10A 109.0 . . ? 
C9 C10 H10B 109.0 . . ? 
C11 C10 H10B 109.0 . . ? 
H10A C10 H10B 107.8 . . ? 
C13 C11 C12 113.07(13) . . ? 
C13 C11 C10 114.05(14) . . ? 
C12 C11 C10 112.56(15) . . ? 
C13 C11 H11 105.4 . . ? 
C12 C11 H11 105.4 . . ? 
C10 C11 H11 105.4 . . ? 
N1 C12 C11 110.81(13) . . ? 
N1 C12 C7 108.85(13) . . ? 
C11 C12 C7 112.80(13) . . ? 
N1 C12 H12 108.1 . . ? 
C11 C12 H12 108.1 . . ? 
C7 C12 H12 108.1 . . ? 
C18 C13 C14 117.73(17) . . ? 
C18 C13 C11 119.96(15) . . ? 
C14 C13 C11 122.31(16) . . ? 
C15 C14 C13 120.9(2) . . ? 
C15 C14 H14 119.5 . . ? 
C13 C14 H14 119.5 . . ? 
C16 C15 C14 120.6(2) . . ? 
C16 C15 H15 119.7 . . ? 
C14 C15 H15 119.7 . . ? 
C15 C16 C17 119.5(2) . . ? 
C15 C16 H16 120.2 . . ? 
C17 C16 H16 120.2 . . ? 
C16 C17 C18 120.3(2) . . ? 
C16 C17 H17 119.9 . . ? 
C18 C17 H17 119.9 . . ? 
C13 C18 C17 120.91(19) . . ? 
C13 C18 H18 119.5 . . ? 
C17 C18 H18 119.5 . . ? 
O1 C19 O2 123.9(2) . . ? 
O1 C19 C8 125.1(2) . . ? 
O2 C19 C8 110.98(16) . . ? 
C21 C20 O2 111.8(3) . . ? 
C21 C20 H20A 109.2 . . ? 
O2 C20 H20A 109.2 . . ? 
C21 C20 H20B 109.2 . . ? 
O2 C20 H20B 109.2 . . ? 
H20A C20 H20B 107.9 . . ? 
C20 C21 H21A 109.5 . . ? 
C20 C21 H21B 109.5 . . ? 
H21A C21 H21B 109.5 . . ? 
C20 C21 H21C 109.5 . . ? 
H21A C21 H21C 109.5 . . ? 
H21B C21 H21C 109.5 . . ? 
O4 N1 O3 122.69(18) . . ? 
O4 N1 C12 118.11(17) . . ? 
O3 N1 C12 119.16(15) . . ? 
C19 O2 C20 118.7(2) . . ? 
 
_diffrn_measured_fraction_theta_max    0.962 
_diffrn_reflns_theta_full              28.24 
_diffrn_measured_fraction_theta_full   0.962 
_refine_diff_density_max    0.309 
_refine_diff_density_min   -0.250 
_refine_diff_density_rms    0.040 
